# Supplementary material for: Combining Well‐Tempered Metadynamics Simulation and SPR Assays to Characterize the Binding Mechanism of the Universal T‐Lymphocyte Tetanus Toxin Epitope TT830‐843
Source: Hindawi journal article supplement (doi:10.1155/2021/5568980), 2021-01-01
Supplement: f1 [file 5568980.f1.pdf]

**Title**

Combining well-tempered metadynamics simulation and SPR assays to characterize the binding mechanism of the universal T-lymphocyte tetanus toxin epitope TT830-843

Artur A. M. L. Brandt<sup>1,6</sup>, Rodrigo N. Rodrigues-da-Silva<sup>2</sup>, Josué C. Lima-Junior<sup>3</sup>, Carlos R. Alves<sup>4,\*</sup>, Franklin de Souza-Silva<sup>5,7</sup>

<sup>1</sup>Faculdade de Educação Tecnológica do Estado do Rio de Janeiro, Rua Clarimundo de Melo, 847, CEP 21311-281, Rio de Janeiro, RJ, Brasil.

<sup>2</sup>Fundação Oswaldo Cruz, Instituto de Tecnologia em Imunobiológicos, Laboratório de Tecnologia Diagnóstica, Avenida Brasil, 4365, CEP 21040-900, Rio de Janeiro, RJ, Brasil.

<sup>3</sup>Fundação Oswaldo Cruz, Instituto Oswaldo Cruz, Laboratório de Imunoparasitologia, Avenida Brasil, 4365, CEP 21040-900, Rio de Janeiro, RJ, Brasil.

<sup>4</sup>Fundação Oswaldo Cruz, Instituto Oswaldo Cruz, Laboratório de Biologia Molecular e Doenças Endêmicas, Avenida Brasil, 4365, CEP 21040-900, Rio de Janeiro, RJ, Brasil.

<sup>5</sup>Centro de Desenvolvimento Tecnológico em Saúde, Fundação Oswaldo Cruz, Rio de Janeiro, Brasil.

<sup>6</sup>Univeritas-Rio, Rua Marques de Abrantes, 55, CEP 2230-060, Rio de Janeiro, RJ, Brasil.

<sup>7</sup>Universidade Iguazu, Faculdade de Ciências Biológicas e da Saúde, Rio de Janeiro, RJ, Brasil

\*Corresponding author E-mail addresses: artur.brandt@faeterj-rio.edu.br (A.A.M.L. Brandt), rodrigonunes.ioc@gmail.com (R.N.Rodrigues-da-Silva), josue@ioc.fiocruz.br (J.C. Lima-Junior), calves@ioc.fiocruz.br (C.R.Alves), franklin.frankss@gmail.com (F.Souza-Silva)

## Supplementary information

File name: Supplementary\_file\_1.pdf.

File format: pdf.

Title of data: Supplementary figures and tables.

Description of data: Supplementary figures S1, S2, S3, and S4; Supplementary tables S1, S2, S3, and S4.

File name: Supplementary\_file\_2.mov.

File format: mov.

Title of data: Peptide exiting from H-2D<sup>b</sup> (side view).

Description of data: Side view of the peptide exiting trajectory from the H-2D<sup>b</sup> protein's cleft during WTMetaD simulation.

Link to the file: <https://drive.google.com/file/d/1j7c--X3t8f0zQjL0DrP3AKYLclyJv0Ei/view?usp=sharing>

File name: Supplementary\_file\_3.mov.

File format: mov.

Title of data: Peptide exiting from H-2D<sup>b</sup> (top view).

Description of data: Top view of the peptide exiting trajectory from the H-2D<sup>b</sup> protein's cleft during WTMetaD simulation.

Link to the file: <https://drive.google.com/file/d/1-jYqKvJAHyNssplAD9re-ojw-rYSuHB8/view?usp=sharing>

File name: Supplementary\_file\_4.gif.

File format: gif.

Title of data: Animated image of the configurations sampled during WTMetaD.

Description of data: A gif animated image showing the projection onto the FES plot of the configurations sampled during WTMetaD

Link to the file: <https://drive.google.com/file/d/1acf2iB5wNbqDM5RPYZyv0K8sEannRISs/view?usp=sharing>

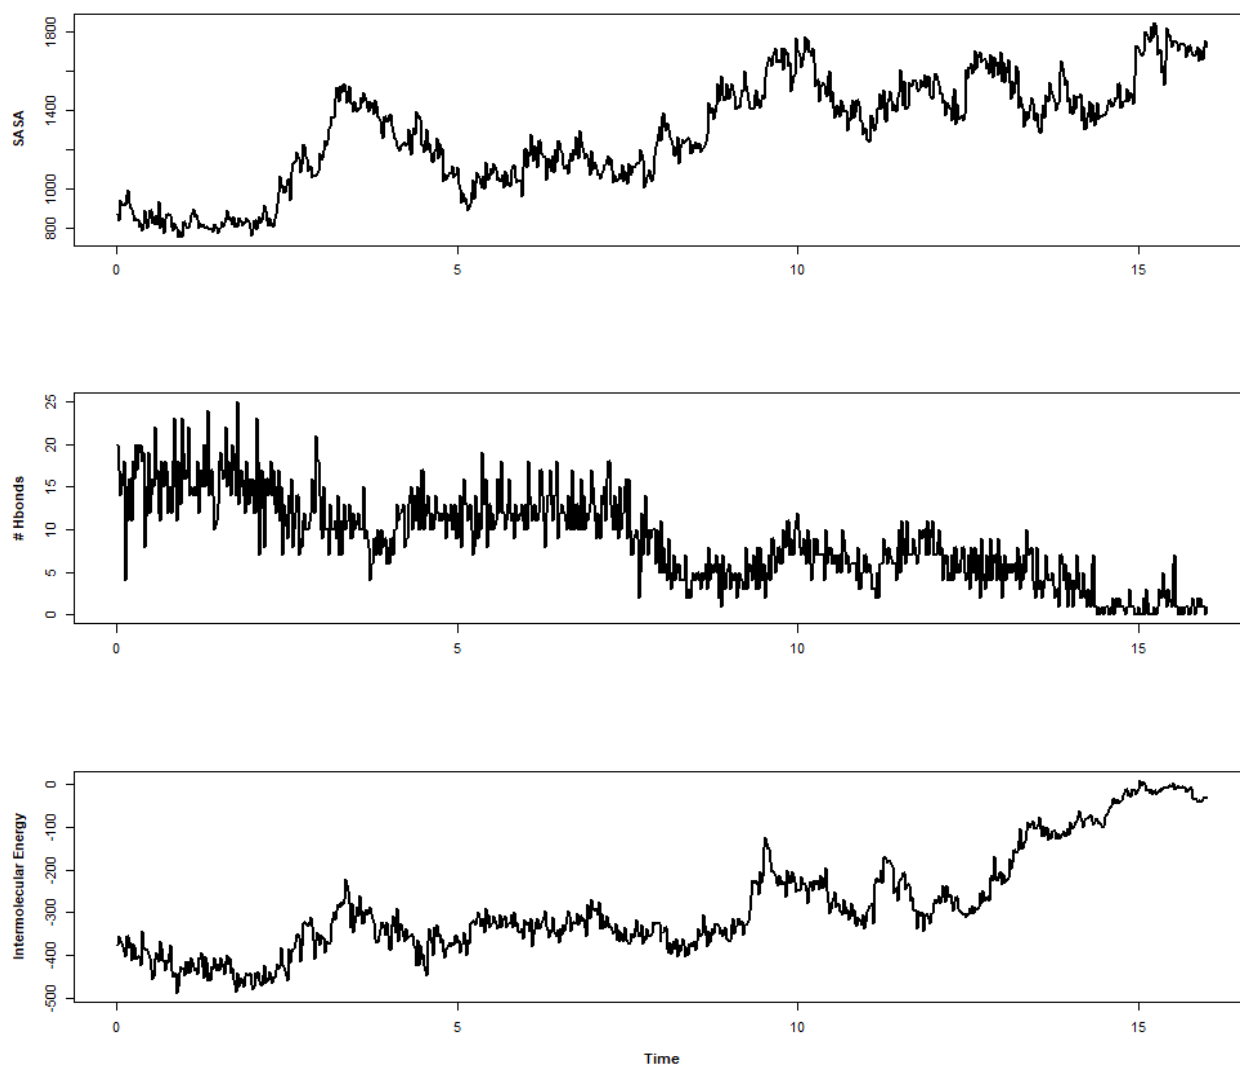

Fig. S1 Time evolution for surface accessible solvent area (SASA), number of hydrogen bonds (#Hbonds), and intermolecular interaction energy (Intermolecular Energy). “SASA” is measured in Å<sup>2</sup>. “#Hbonds” corresponds to the sum of all hydrogen bonds between the peptide and H-2D<sup>b</sup> receptor in each simulation frame. “Intermolecular Energy” is measured in kcal/mol as the sum of electrostatic and Lennard-Jones terms. In all panels, structure properties were plotted as function of simulation time in nanosecond (ns).

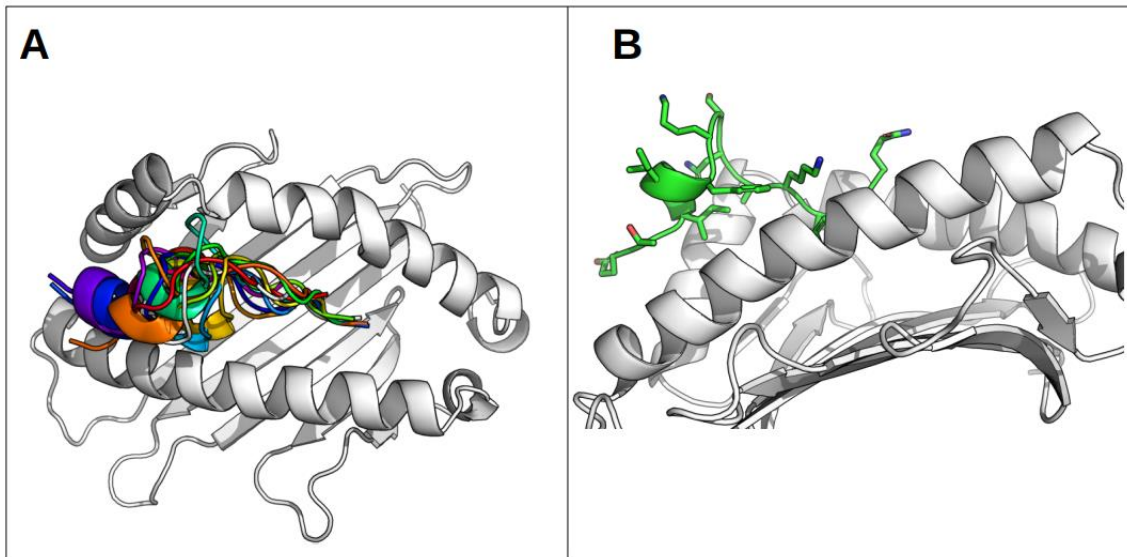

Fig. S2 Results for job submitted to FlexPepDock webserver. (A) Resulting models obtained from refinement of coarse starting model. Each model is represented in different colors. (B) Best-ranked pose, the structure with the lowest energy used as the initial structure for WTMetaD simulation.

### The stability of the peptide initial molecular structure

A minimization-equilibration cycle was performed to prevent the introduction of artifacts from an unstable starting structure obtained from Rosetta FlexPepDock and to ensure that the positions of peptide initial molecular configuration are reasonable. This step was used to validate whether the peptide structure is conformationally stable. Fig. S3 plots the calculated peptide backbone RMSD (root mean square deviation) to assess its stability within the H-2 D<sup>b</sup> receptor. Calculated RMSD converges to an average value of 1.85 Å, meaning the system was equilibrated before the production simulation.

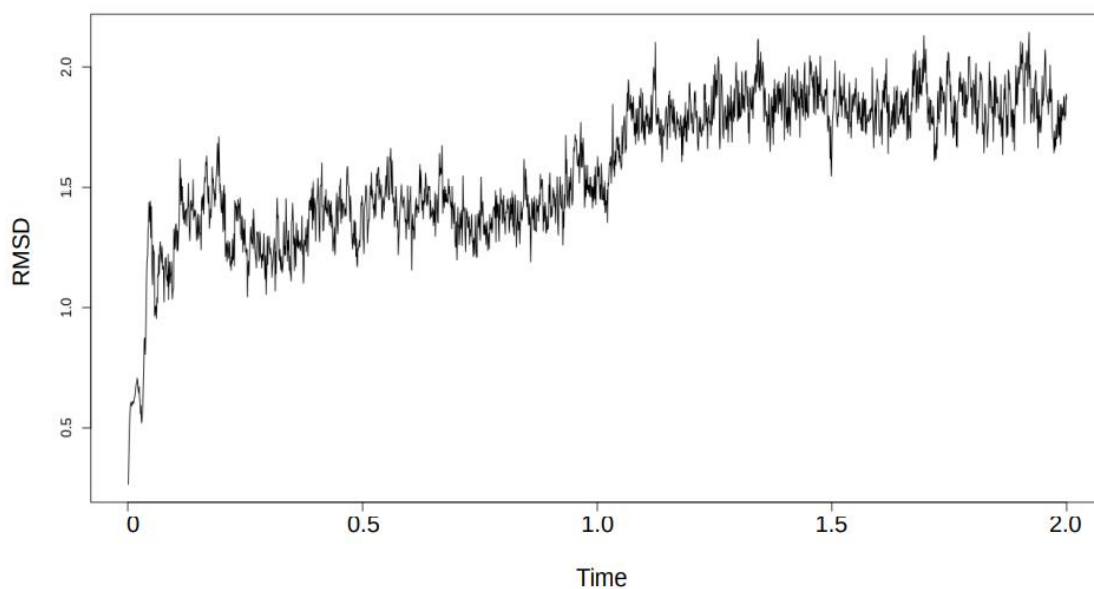

Fig. S3 The stability of the peptide initial molecular structure. Peptide backbone RMSD versus simulation time during minimization-equilibration cycle. RMSD is measured in Å and simulation time in nanosecond (ns).

Table S1 Persistence of H-bond interactions during WTMetaD simulation.

| Peptide residue | H-2D <sup>b</sup> residue | %     |
|-----------------|---------------------------|-------|
| GLN P1          | TYR 7                     | 0.01  |
| GLN P1          | GLU 58                    | 0.04  |
| GLN P1          | TYR 59                    | 1.51  |
| GLN P1          | ARG 62                    | 1.54  |
| GLN P1          | GLU 63                    | 12.09 |
| GLN P1          | LYZ 66                    | 2.69  |
| GLN P1          | TYR 159                   | 4.78  |
| GLN P1          | GLU 163                   | 0.04  |
| GLN P1          | TRP 167                   | 7.29  |
| GLN P1          | TYR 171                   | 0.13  |
| TYR P2          | TYR 7                     | 0.52  |
| TYR P2          | GLU 9                     | 8.18  |
| TYR P2          | SER 24                    | 0.01  |
| TYR P2          | GLU 63                    | 5.38  |
| TYR P2          | LYZ 66                    | 4.06  |
| TYR P2          | GLN 70                    | 1.38  |
| TYR P2          | TRP 73                    | 0.02  |
| TYR P2          | GLN 97                    | 1.43  |
| TYR P2          | SER 99                    | 0.69  |
| TYR P2          | HSE 155                   | 0.15  |
| TYR P2          | TYR 156                   | 0.33  |
| TYR P2          | TYR 159                   | 8.14  |
| TYR P2          | GLU 163                   | 0.03  |
| TYR P2          | TRP 167                   | 0.01  |
| ILE P3          | LYS 66                    | 1.29  |
| ILE P3          | GLN 70                    | 0.05  |
| ILE P3          | TRP 73                    | 0.01  |
| ILE P3          | GLU 154                   | 0.01  |
| ILE P3          | HSE 155                   | 1.21  |
| ILE P3          | TYR 156                   | 0.53  |
| ILE P3          | ALA 158                   | 0.28  |
| ILE P3          | TYR 159                   | 1.17  |
| ILE P3          | GLU 163                   | 0.17  |
| LYS P4          | GLN 65                    | 0.01  |
| LYS P4          | LYZ 66                    | 0.59  |
| LYS P4          | HSE 155                   | 0.02  |
| LYS P4          | GLU 163                   | 3.24  |
| LYS P4          | GLU 166                   | 0.79  |
| ALA P5          | ARG 62                    | 0.04  |
| ALA P5          | LYZ 66                    | 0.01  |
| ALA P5          | GLN 70                    | 0.14  |
| ALA P5          | TRP 73                    | 0.01  |
| ALA P5          | HSE 155                   | 0.31  |
| ASN P6          | ARG 62                    | 0.26  |
| ASN P6          | LYZ 66                    | 0.25  |
| ASN P6          | GLU 154                   | 0.04  |
| ASN P6          | HSE 155                   | 2.58  |
| ASN P6          | ALA 158                   | 0.04  |
| SER P7          | GLU 58                    | 0.03  |
| SER P7          | ARG 62                    | 0.05  |
| SER P7          | GLN 72                    | 0.03  |
| SER P7          | TRP 73                    | 0.05  |
| SER P7          | SER 150                   | 0.02  |
| SER P7          | GLU 154                   | 0.02  |
| SER P7          | HSE 155                   | 0.71  |
| LYS P8          | TRP 73                    | 0.13  |
| LYS P8          | SER 150                   | 0.19  |
| LYS P8          | GLY 151                   | 0.21  |
| LYS P8          | HSE 155                   | 0.08  |
| PHE P9          | LYZ 66                    | 0.01  |
| PHE P9          | GLN 72                    | 0.54  |
| PHE P9          | TRP 73                    | 0.41  |
| PHE P9          | VAL 76                    | 0.21  |
| PHE P9          | HSE 155                   | 0.01  |
| PHE P9          | ALA 158                   | 0.02  |
| PHE P9          | GLU 163                   | 0.02  |
| ILE P10         | GLN 72                    | 0.06  |
| ILE P10         | VAL 76                    | 0.03  |
| ILE P10         | ARG 79                    | 0.01  |
| ILE P10         | LYS 146                   | 0.05  |
| ILE P10         | HSE 155                   | 0.01  |
| GLY P11         | LYS 146                   | 0.04  |
| GLY P11         | SER 150                   | 0.02  |
| ILE P12         | ARG 62                    | 0.03  |
| ILE P12         | GLY 69                    | 0.05  |
| ILE P12         | GLN 72                    | 0.19  |
| ILE P12         | TRP 73                    | 1.17  |
| ILE P12         | VAL 76                    | 0.02  |
| ILE P12         | ALA 152                   | 0.08  |
| ILE P12         | HSE 155                   | 0.04  |
| ILE P12         | TYR 156                   | 0.07  |
| THR P13         | TRP 73                    | 1.31  |
| THR P13         | VAL 76                    | 0.39  |
| THR P13         | SER 77                    | 0.06  |
| THR P13         | ASN 80                    | 0.09  |
| THR P13         | LYS 146                   | 0.03  |
| THR P13         | TRP 147                   | 1.22  |
| GLU P14         | TRP 73                    | 0.03  |
| GLU P14         | SER 77                    | 2.23  |
| GLU P14         | ASN 80                    | 2.51  |
| GLU P14         | TYR 84                    | 0.29  |
| GLU P14         | TYR 123                   | 1.07  |
| GLU P14         | THR 143                   | 0.32  |
| GLU P14         | LYS 146                   | 7.81  |
| GLU P14         | TRP 147                   | 1.89  |
| GLU P14         | SER 150                   | 2.64  |
| Total %         |                           | 100   |

Table S2 FlexPepDock top 10 models

| Description | Total score (*) | RmsBB (Å) |
|-------------|-----------------|-----------|
| Top 1       | -108.304        | 6.932     |
| Top 2       | -107.106        | 2.151     |
| Top 3       | -106.810        | 4.392     |
| Top 4       | -104.485        | 3.509     |
| Top 5       | -104.362        | 2.407     |
| Top 6       | -103.209        | 2.832     |
| Top 7       | -100.851        | 5.914     |
| Top 8       | -100.680        | 3.442     |
| Top 9       | -100.406        | 3.908     |
| Top 10      | -100.189        | 5.865     |
| ALA P14     | TYR 84          | 7.11      |
| ALA P14     | THR 143         | 9.19      |
| ALA P14     | LYS 146         | 6.98      |

(\*) The models obtained from FlexPepDock were ranked according to Rosetta energy score.

Table S3 Selected H-bond interaction persistence during WTMetaD for ALA mutation in the peptide's position P14.

| Peptide residue | H-2D <sup>b</sup> residue | % (*) |
|-----------------|---------------------------|-------|
| GLN P1          | GLU 163                   | 3.59  |
| GLN P1          | TRP 167                   | 4.15  |
| TYR P2          | GLU 9                     | 3.30  |
| TYR P2          | GLU 63                    | 3.73  |
| ILE P3          | HSE 155                   | 2.14  |
| ILE P10         | SER 150                   | 2.07  |
| ILE P12         | TRP 73                    | 3.17  |
| THR P13         | TRP 147                   | 6.42  |
| ALA P14         | SER 77                    | 6.60  |
| ALA P14         | ASN 80                    | 5.16  |
| ALA P14         | TYR 84                    | 7.11  |
| ALA P14         | THR 143                   | 9.19  |
| ALA P14         | LYS 146                   | 6.98  |

(\*) Considering only persistence corresponding to the percentage of the total number of H-bond interactions greater than 2 %.



Table S4 Selected H-bond interaction persistence during WTMetaD for GLY mutation in the peptide's position P14.

| Peptide residue | H-2D <sup>b</sup> residue | % (*) |
|-----------------|---------------------------|-------|
| GLN P1          | TYR 59                    | 2.95  |
| GLN P1          | GLU 63                    | 11.57 |
| GLN P1          | TYR 159                   | 2.85  |
| GLN P1          | TRP 167                   | 5.41  |
| TYR P2          | GLU 9                     | 3.26  |
| TYR P2          | LYS 66                    | 2.37  |
| TYR P2          | GLN 70                    | 2.22  |
| TYR P2          | HSE 155                   | 2.47  |
| TYR P2          | TYR 159                   | 5.40  |
| TYR P2          | GLU 163                   | 2.21  |
| LYS P4          | GLU 163                   | 10.19 |
| LYS P4          | GLU 166                   | 3.90  |
| LYS P8          | HSE 155                   | 2.01  |
| THR 13          | TRP 147                   | 2.09  |
| GLY P14         | ASN 80                    | 2.30  |
| GLY P14         | THR 143                   | 2.73  |
| GLY P14         | LYS 146                   | 2.23  |

(\*) Considering only persistence corresponding to the percentage of the total number of H-bond interactions greater than 2 %.
